# Supplementary material for: TRIM21 mediates the synergistic effect of Olaparib and Sorafenib by degrading BRCA1 through ubiquitination in TNBC
Source: PubMed Central journal article supplement (PMC10589312; doi:10.1038/s41523-023-00588-1), 2023-10-20
Supplement: 41523_2023_588_MOESM1_ESM.pdf [file 41523_2023_588_MOESM1_ESM.pdf]

**Supplementary Table S1: plasmids information**

| Gene Name            | Vector                  | Type                                              |
|----------------------|-------------------------|---------------------------------------------------|
| h-TRIM21             | pCDH-CMV-MCS-EF1-copGFP | Overexpression Plasmid (for lentivirus infection) |
| h-TRIM21             | pCMV3-ORF-Myc           | Overexpression Plasmid                            |
| h-BRCA1              | pDEST-Flag              | Overexpression Plasmid                            |
| h-TRIM21             | Plenticrispr v2         | SgRNA Plasmid                                     |
| h-TRIM21-ligase dead | pLNCX2 ER:ras           | Overexpression Plasmid                            |

**Supplementary Table S2: IC<sub>50</sub> of TNBC cell lines**

| Parental Cell lines | Gene expression/mutation | IC <sub>50</sub> (μM) |
|---------------------|--------------------------|-----------------------|
| MDA-MB-231          | TRIM21 WT                | 68.78                 |
| MDA-MB-231          | TRIM21 OE                | 31.88                 |
| MDA-MB-231          | TRIM21 KO                | 142.31                |
| HCC1806             | TRIM21 WT                | 71.87                 |
| HCC1806             | TRIM21 OE                | 45.67                 |
| HCC1806             | TRIM21 KO                | 169.20                |
| BT-20               | TRIM21 WT                | 153.1                 |
| MDA-MB-436          | BRCA1 mutation           | 18.86                 |

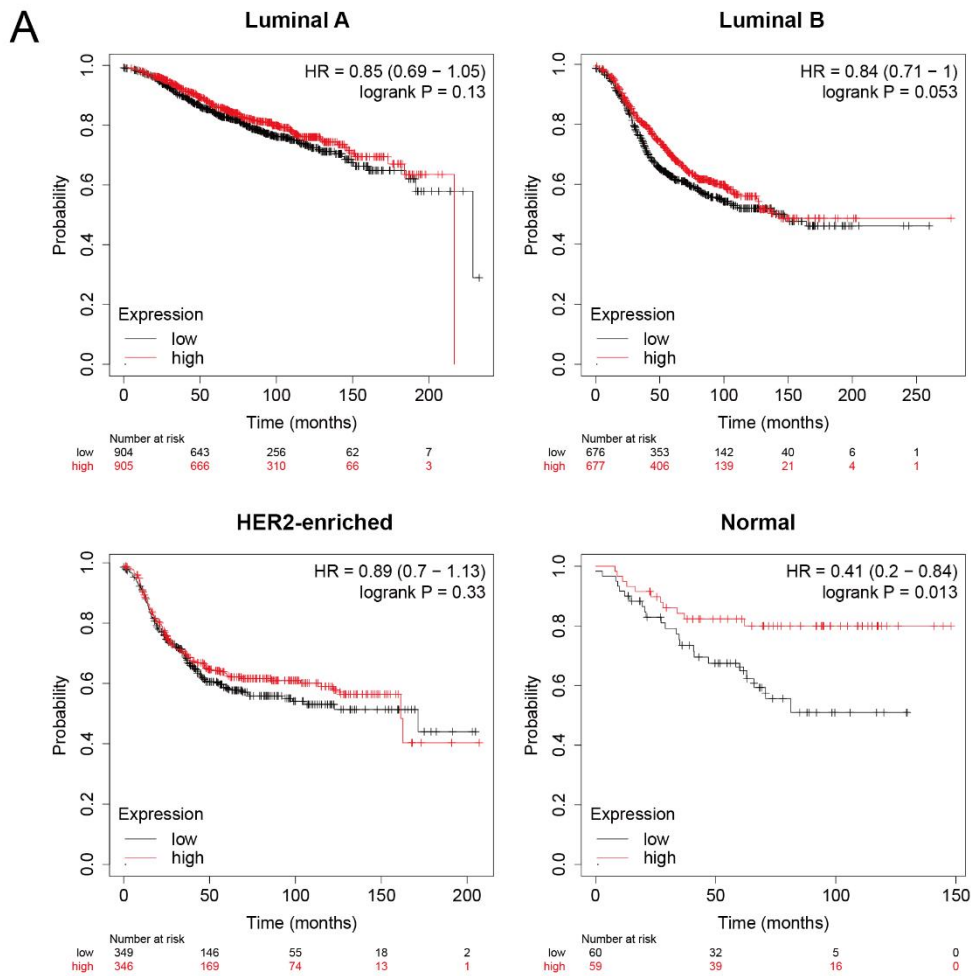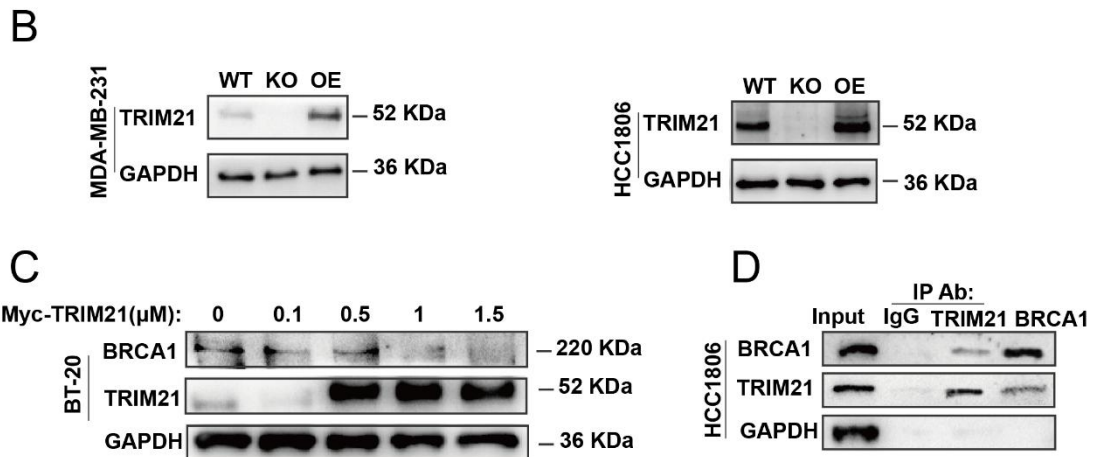

**Supplementary Figure 1.** (A) The correlation between the expression level of TRIM21 and relapse-free survival of Luminal A, Luminal B, HER2-enriched, and normal breast cancer types analyzed by gene chip. (B) WB verification for TRIM21<sup>KO</sup> and TRIM21<sup>OE</sup> TNBC cells. (C). The endogenous BRCA1 protein level was examined after transfecting with exogenous TRIM21.

(D). The CO-IP result between TRIM21, BRCA1 and GAPDH were confirmed by WB.

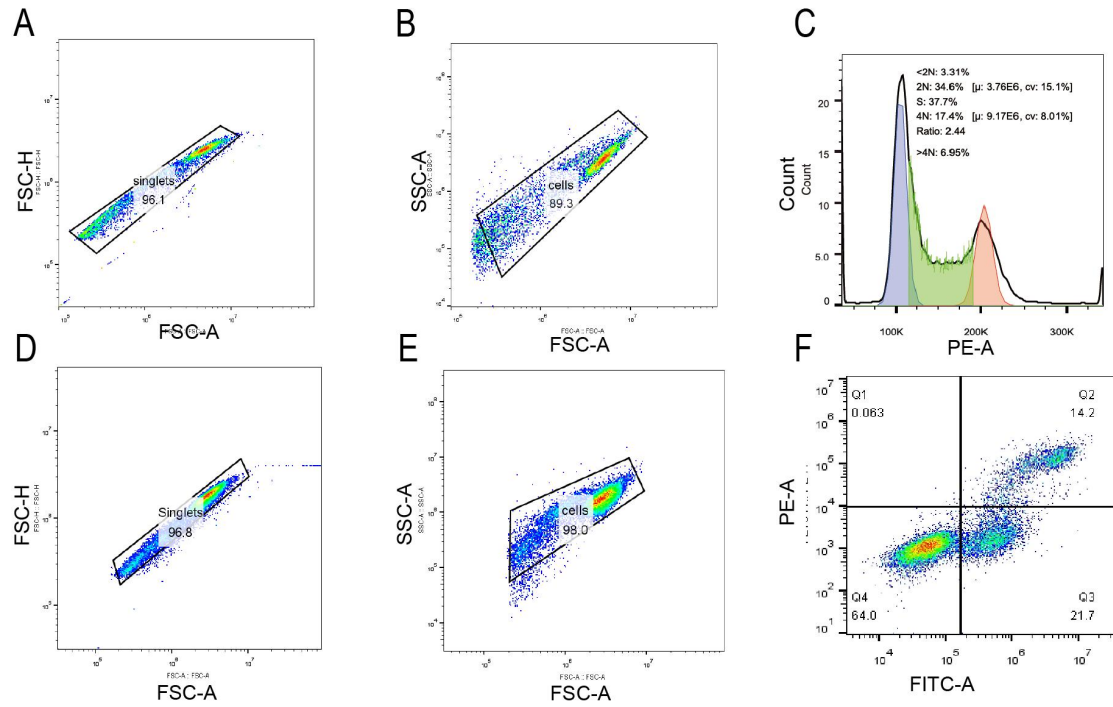

**Supplementary Figure 2.** Gating strategies used in flow cytometric analysis of tumor cell lines. A and D: Debris were gated out. B and E: non-viable cells were gated out. C: cell cycle are divided by the Watson Pragmatic algorithm provided by FlowJo v10. Apoptosis are gated by PE-A and FITC-A. Q2: non-viable apoptotic cells. Q3: early apoptotic cells. Q4: non-apoptotic cells.

Marker 170kDa-

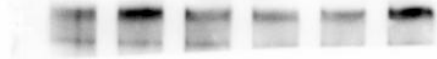

-220kDa  
Figure 2C BRCA1

Marker 55kDa-

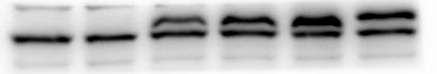

-52kDa  
Figure 2C TRIM21

Marker 40kDa-

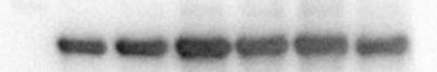

-36kDa  
Figure 2D GAPDH

Marker 170kDa-

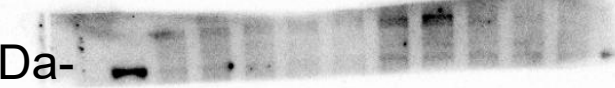

-220kDa  
Figure 2E BRCA1

Marker 55kDa-

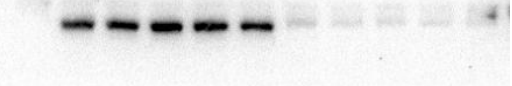

-52kDa  
Figure 2E TRIM21

Marker 40kDa-

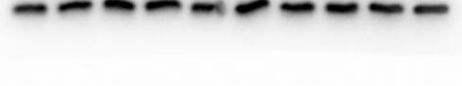

-36kDa  
Figure 2E GAPDH

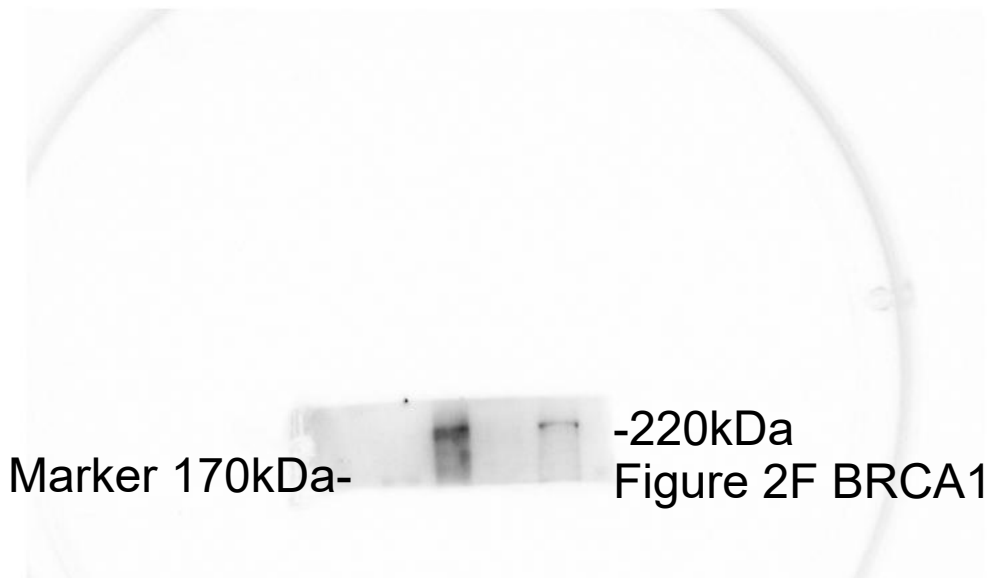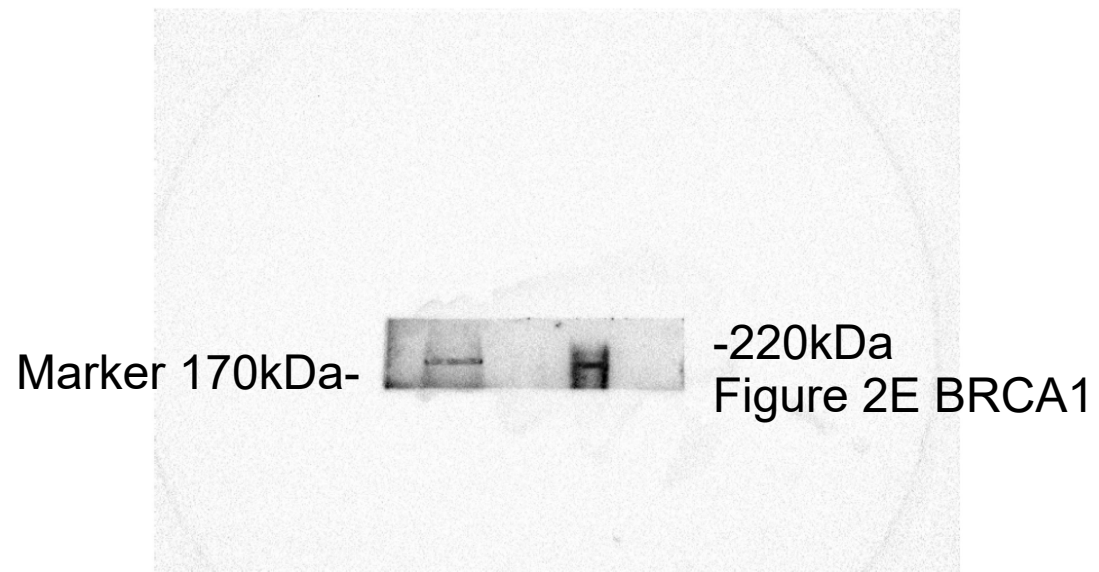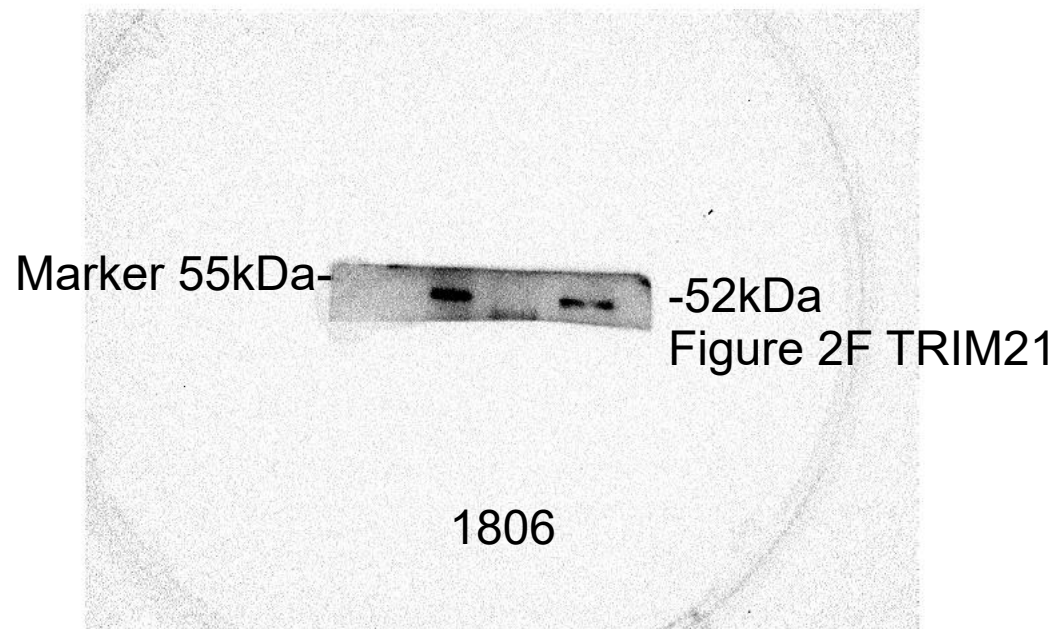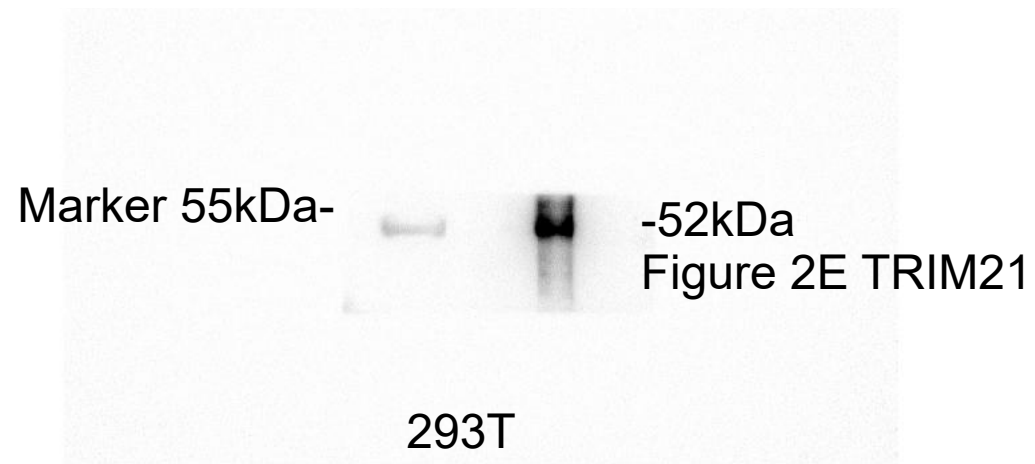

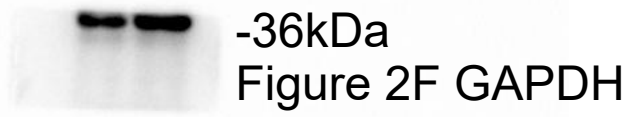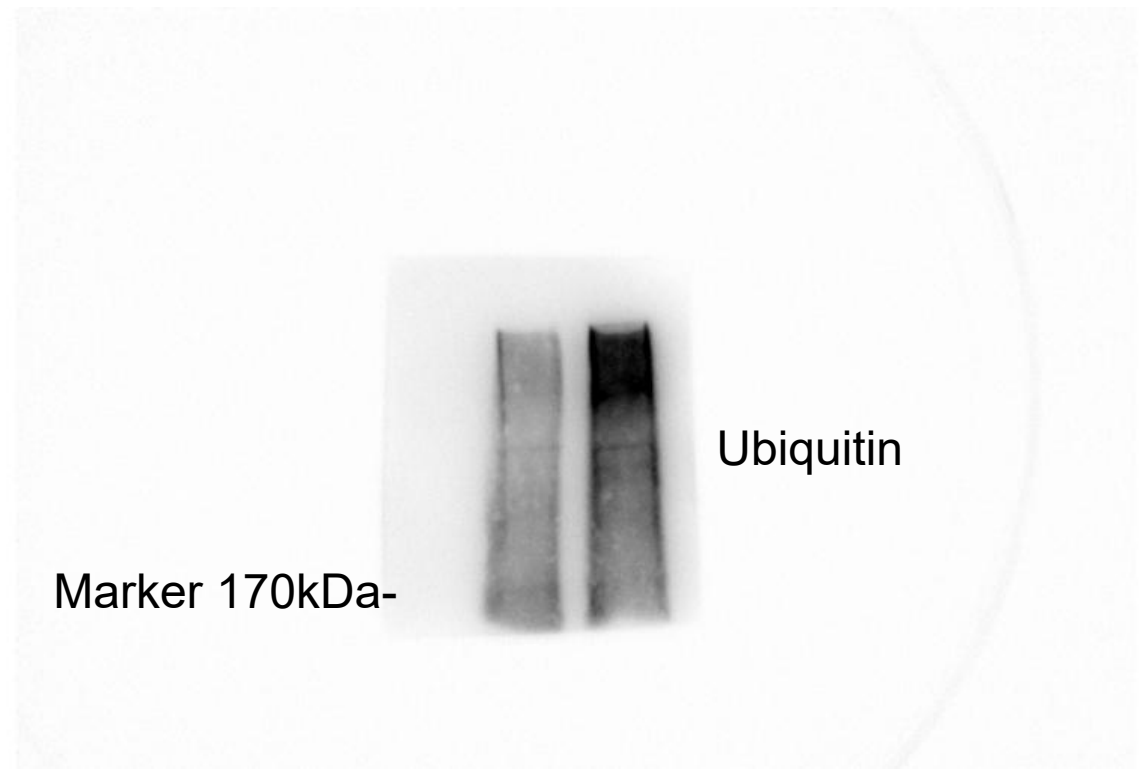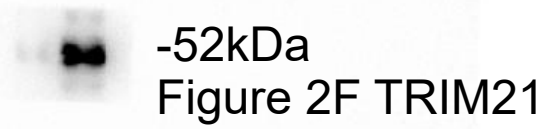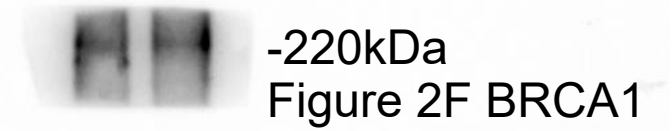

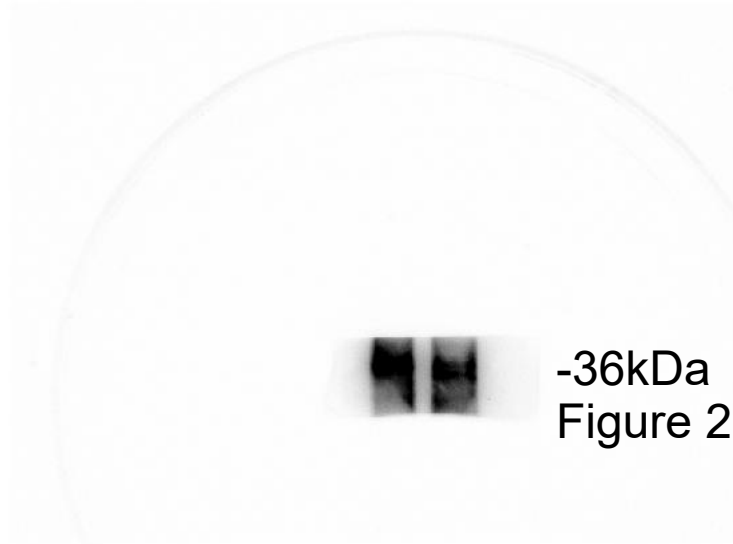

-36kDa  
Figure 2F GAPDH

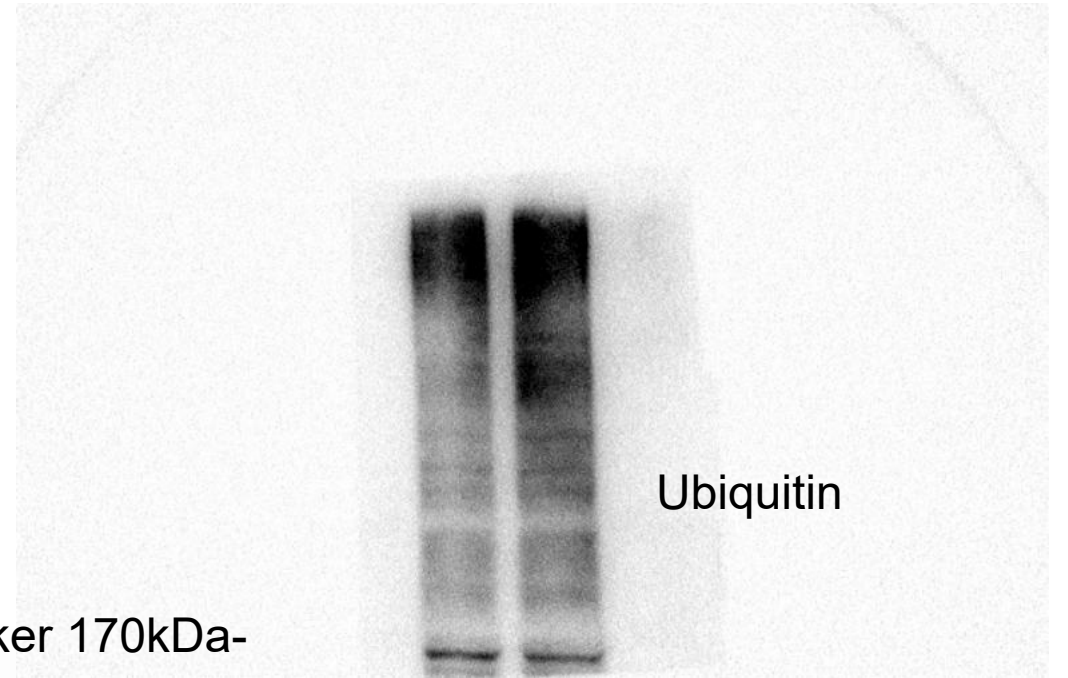

Ubiquitin

Marker 170kDa-

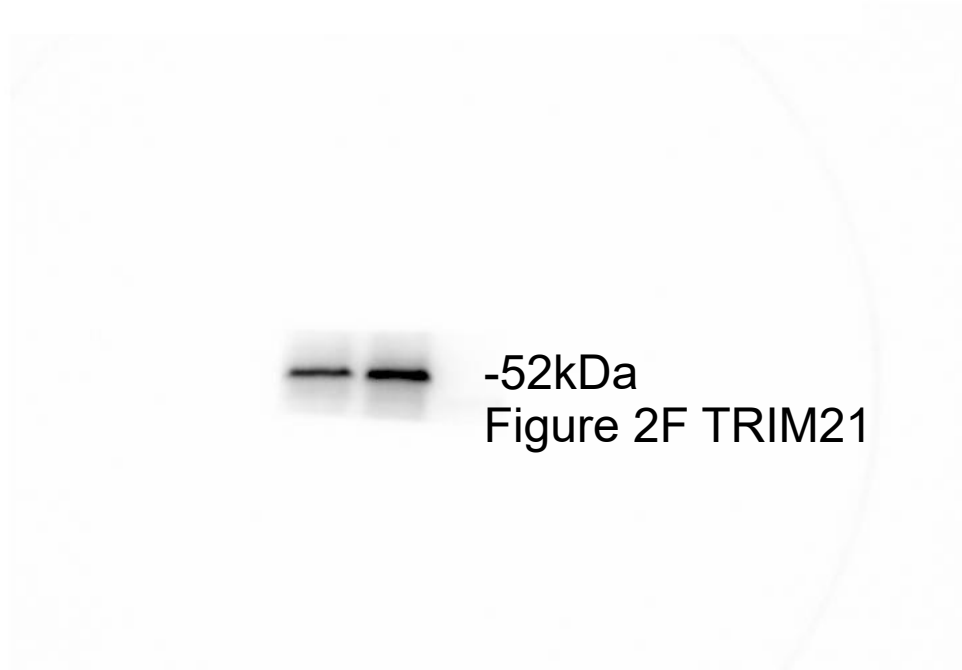

-52kDa  
Figure 2F TRIM21

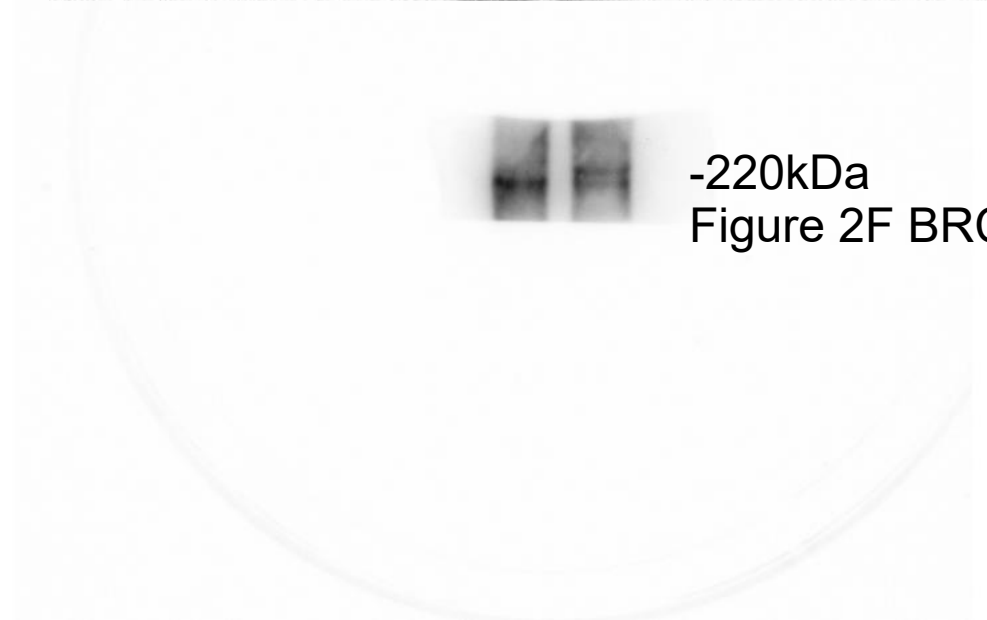

-220kDa  
Figure 2F BRCA1

Marker 40kDa-

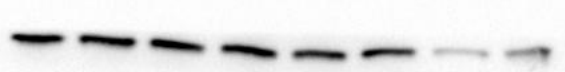

-36kDa Figure 3B GAPDH

Marker 170kDa-

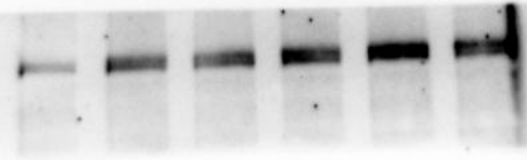

-220kDa  
Figure 3B BRCA1

BT-20

Marker 40kDa-

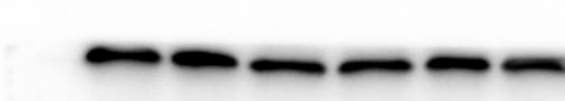

-36kDa Figure 3B GAPDH

70kDa-

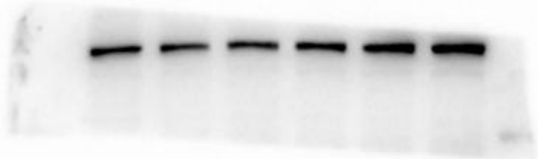

-220kDa  
Figure 3B BRCA1

Marker 40kDa-

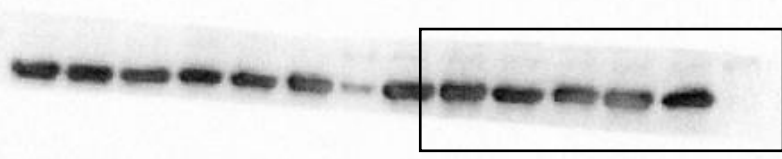

-36kDa  
Figure 3B  
GAPDH

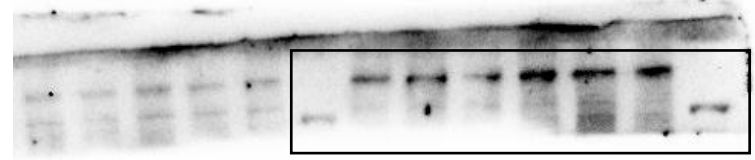

-220kDa  
Figure 3B BRCA1

231



Marker 170kDa-

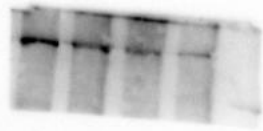

-220kDa  
Figure 4A BRCA1

Marker 170kDa-

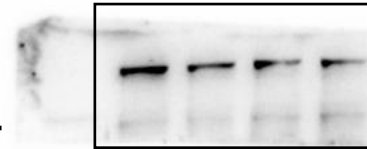

-220kDa  
Figure 4A BRCA1

Marker 55kDa-

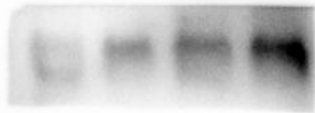

-52kDa  
Figure 4A TRIM

Marker 55kDa-

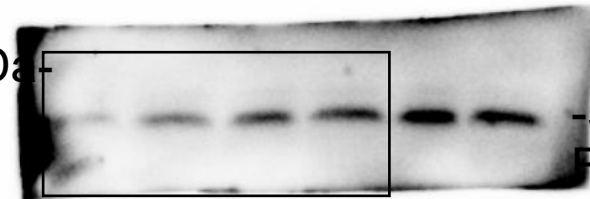

-52kDa  
Figure 4A TRIM21

Marker 40kDa-

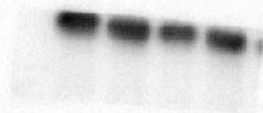

-36kDa  
Figure 4A GAPDH

Marker 40kDa-

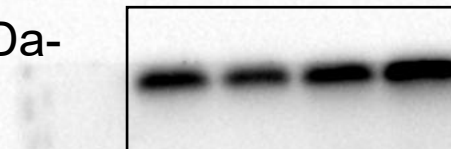

-36kDa  
Figure 4A GAPDH

231

1806

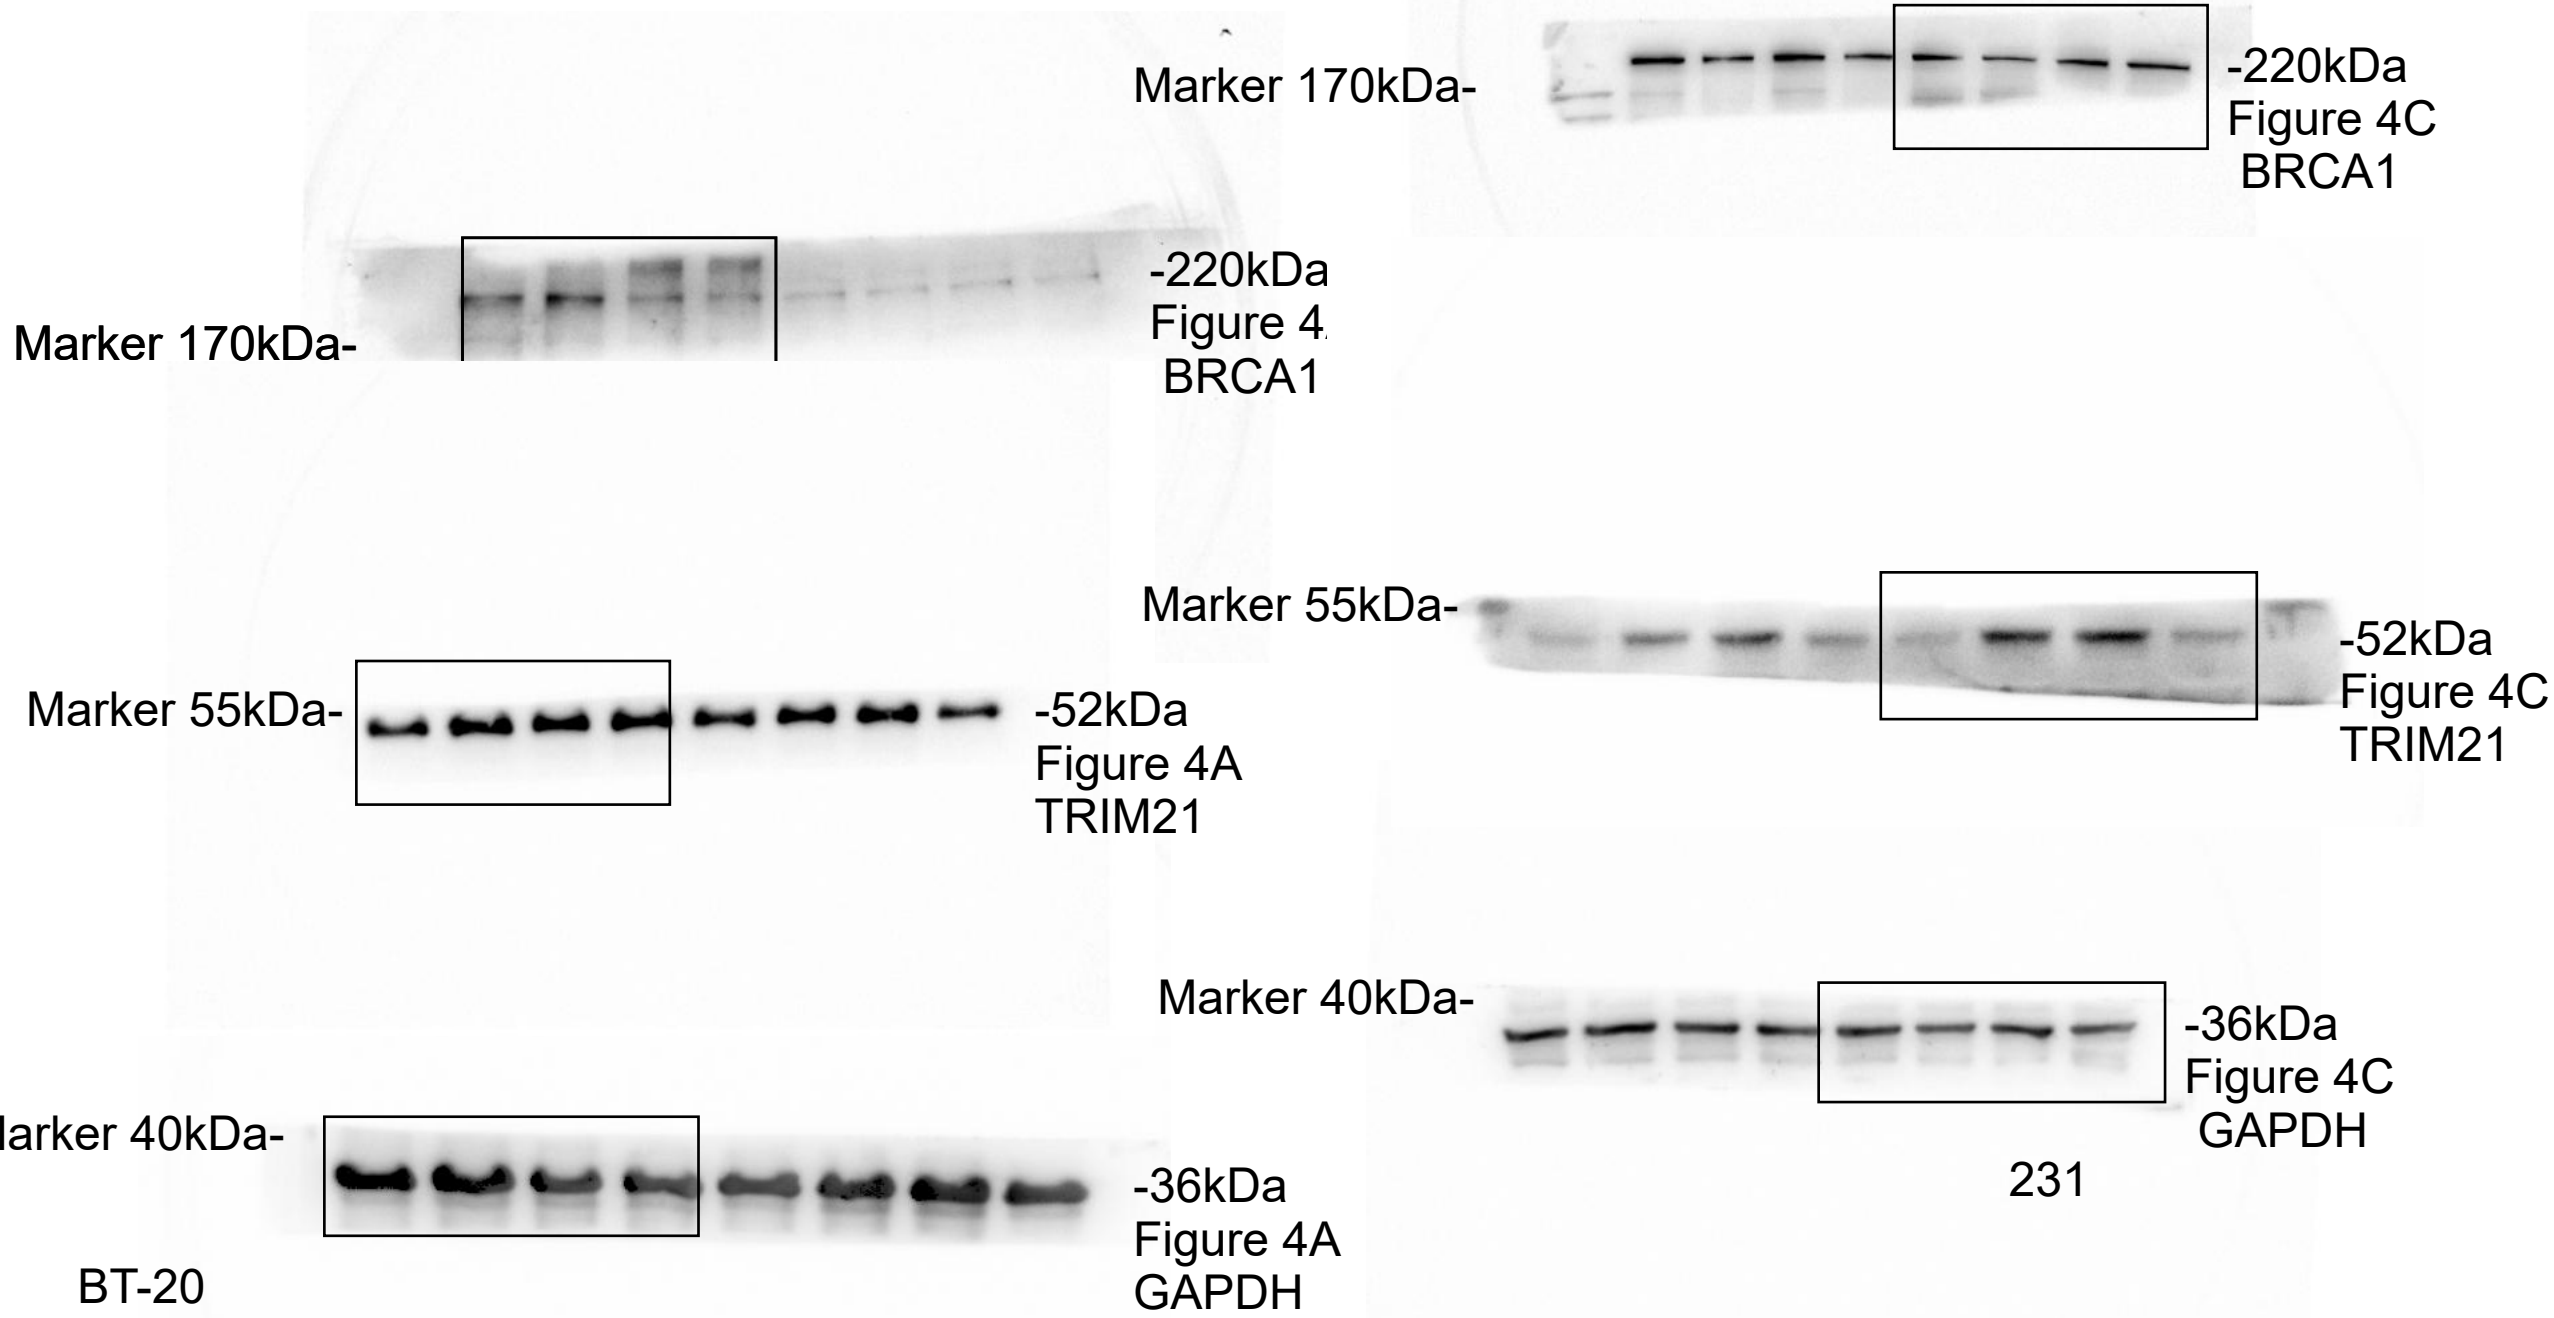

Marker 40kDa-

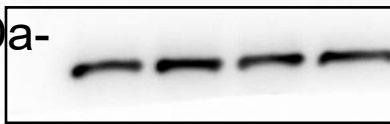

-36kDa Figure 4C GAPDH

Marker 170kDa-

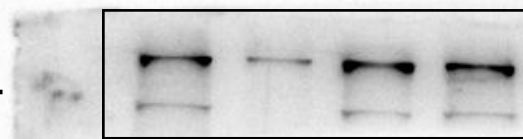

-220kDa  
Figure 4C BF

Marker 55kDa-

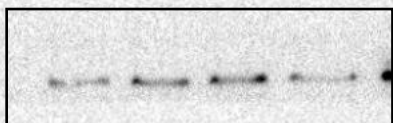

-52kDa Figure 4C TRIM21

1806

Marker 40kDa-

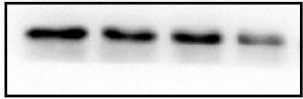

-36kDa Figure 4C GAPDH

Marker 170kDa-

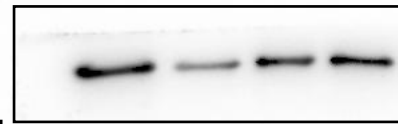

-220kDa  
Figure 4C BRCA1

Marker 55kDa-

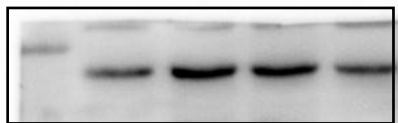

-52kDa Figure 4C TRIM21

BT-20

Marker 40kDa-

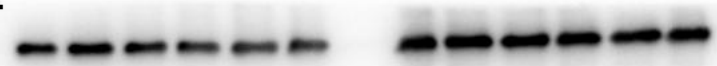

-36kDa Figure 4D GAPDH

Marker 170kDa-

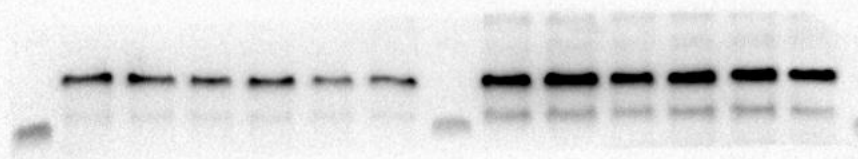

-220kDa  
Figure 4D BRCA1

Marker 55kDa-

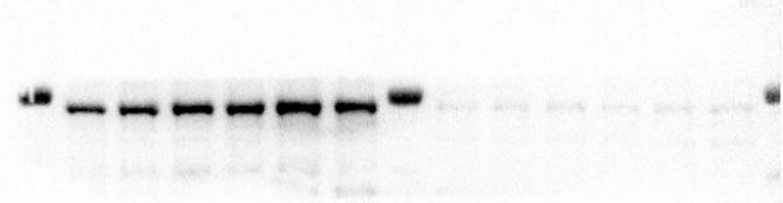

-52kDa Figure 4D TRIM21

Marker 40kDa- -36kDa Figure 4E GAPDH

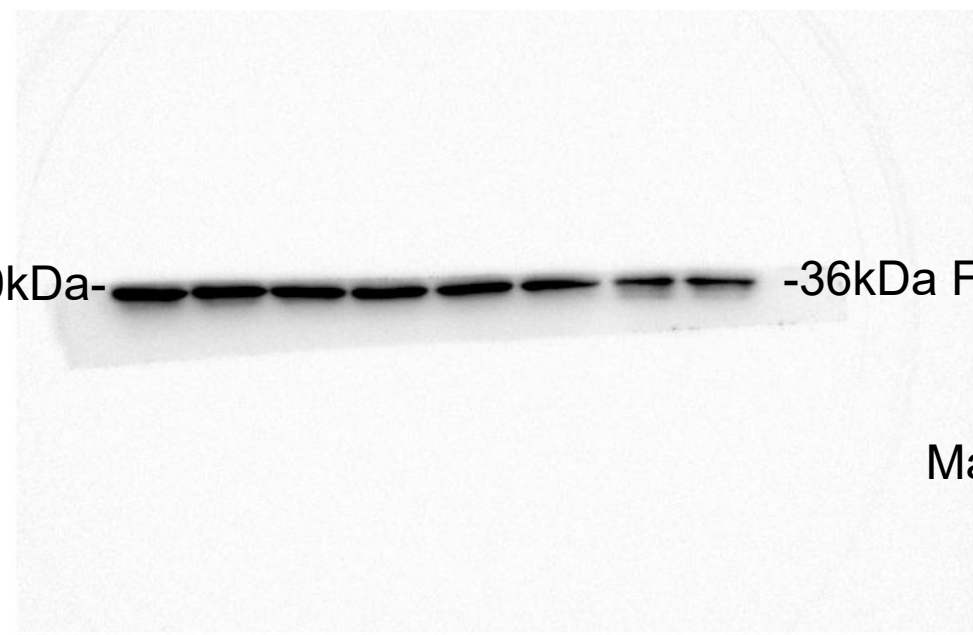

Marker 170kDa-

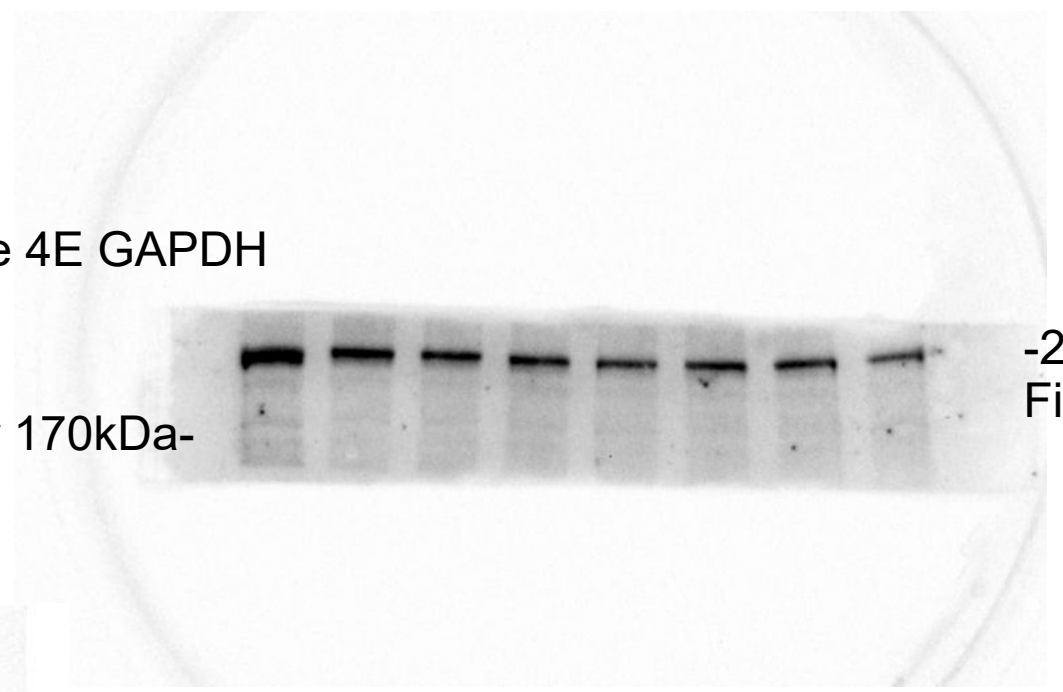

-220kDa  
Figure 4EB

Marker 55kDa- -52kDa Figure 4E TRIM21

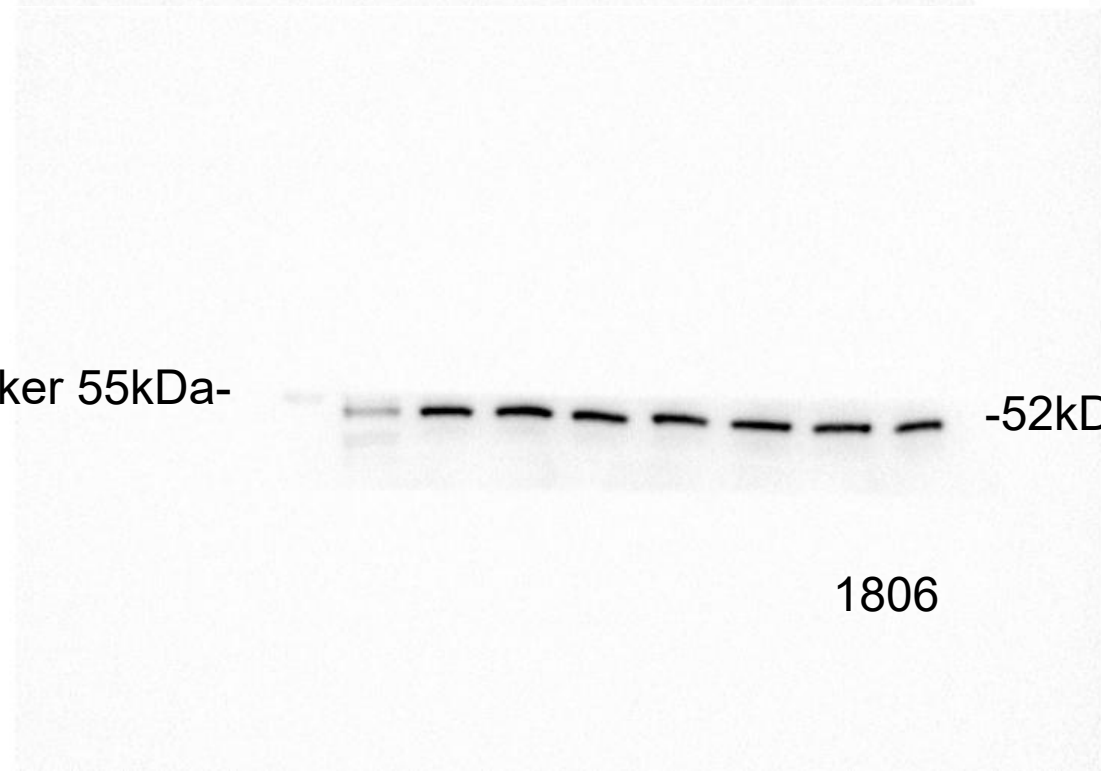

1806

Marker 40kDa- -36kDa Figure 4E GAPDH

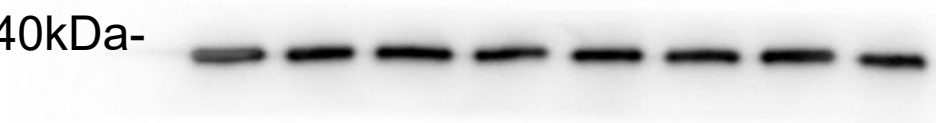

Marker 170kDa- -220kDa Figure 4E BRCA1

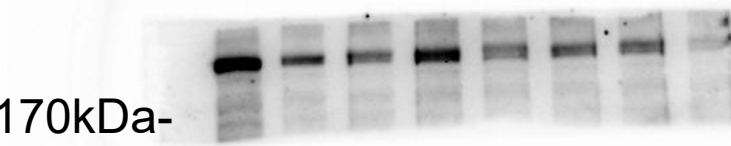

Marker 55kDa- -52kDa Figure 4E TRIM21

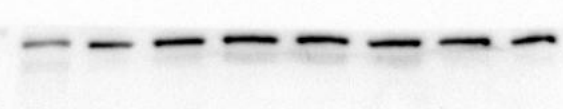

BT-20

Marker 40kDa-

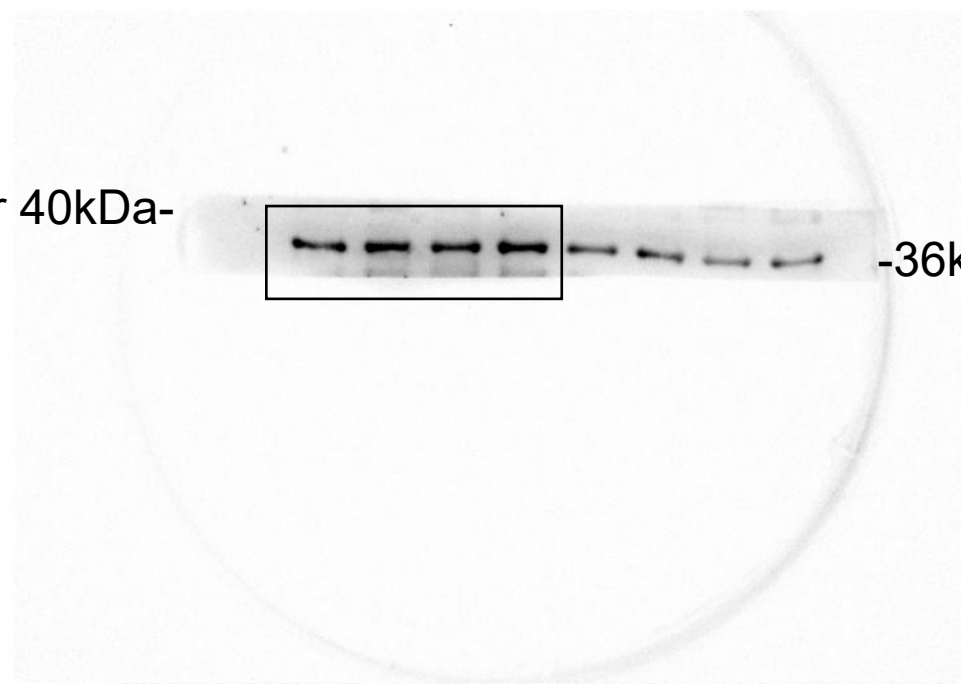

-36kDa Figure 6B GAPDH

Marker 15kDa-

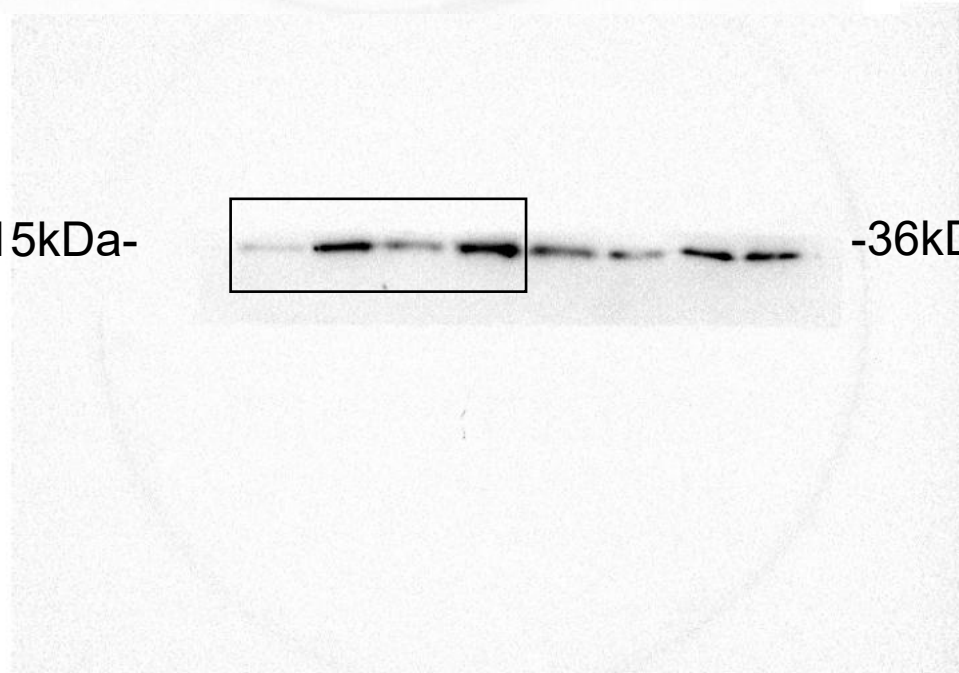

-36kDa Figure 6B  $\gamma$ H2AX



Marker 40kDa-

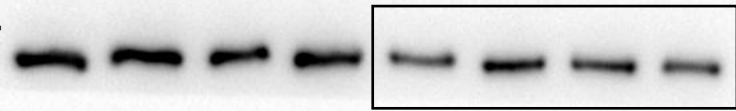

-36kDa Figure 6B GAPDH

Marker 25kDa-

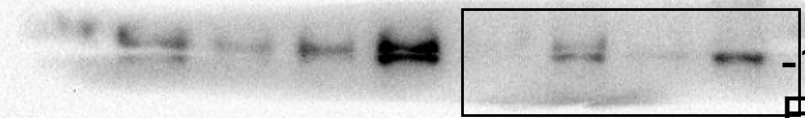

-17kDa  
Figure 6B C-caspase

Marker 35kDa-

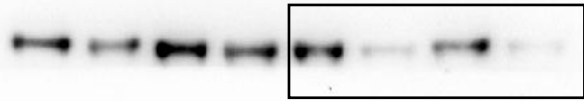

-32kDa  
Figure 6B P-caspase
